# Supplementary material for: Associations of Dietary Patterns and Vitamin D Levels with Iron Status in Pregnant Women: A Cross-Sectional Study in Taiwan
Source: MDPI journal article supplement (doi:10.3390/nu15081805), 2023-04-07
Supplement: s1 [file s1]

## Supplementary Tables

**Table S1.** Food groups and subgroups for dietary assessment.

| Food Groups | Subgroups                                                  |
|-------------|------------------------------------------------------------|
| FFQ-G1      | Dry rice and porridge                                      |
| FFQ-G2      | Noodles and related products                               |
| FFQ-G3      | Breakfast cereals and bread and related products           |
| FFQ-G4      | Cake, pastry, and dumplings                                |
| FFQ-G5      | Salty buns and sweet buns                                  |
| FFQ-G6      | Glutinous rice desserts and rhizome starch                 |
| FFQ-G7      | Carrots, roots, and tubers                                 |
| FFQ-G8      | Eggs                                                       |
| FFQ-G9      | Milk and milk products                                     |
| FFQ-G10     | Nondairy products, such as soy and rice milk               |
| FFQ-G11     | Light-colored vegetables                                   |
| FFQ-G12     | Dark-colored vegetables                                    |
| FFQ-G13     | Bamboo shoots and melons                                   |
| FFQ-G14     | Mushrooms and related products                             |
| FFQ-G15     | Legumes and various beans                                  |
| FFQ-G16     | Marine plants and kelp                                     |
| FFQ-G17     | Pickled vegetables                                         |
| FFQ-G18     | Herbs and spices                                           |
| FFQ-G19     | General soy products and gluten pasta                      |
| FFQ-G20     | Nuts and nut products                                      |
| FFQ-G21     | Fresh fruits                                               |
| FFQ-G22     | 100% Pure juice and commercially available vegetable juice |
| FFQ-G23     | Canned fruits, dehydrated fruits, pickled fruits, and jam  |
| FFQ-G24     | Aquatic fish, shell, shellfish, and seafood                |
| FFQ-G25     | Deep water fish                                            |
| FFQ-G26     | Seafood products                                           |
| FFQ-G27     | Poultry meat                                               |
| FFQ-G28     | Livestock lean meat                                        |
| FFQ-G29     | Livestock semifat meat                                     |
| FFQ-G30     | Animal organ meat and blood                                |
| FFQ-G31     | Processed meat and meat pulp                               |
| FFQ-G32     | Salt                                                       |

FFQ, food frequency questionnaire.

**Table S2.** Daily dietary intake of women across the tertiles of serum vitamin D levels ( $n = 1502$ )<sup>1</sup>.

| Dietary Intake                                   | Tertiles of Serum Vitamin D <sup>2</sup> |                             |                             | <i>p</i> -Value <sup>3</sup> |
|--------------------------------------------------|------------------------------------------|-----------------------------|-----------------------------|------------------------------|
|                                                  | T1 ( <i>n</i> = 505)                     | T2 ( <i>n</i> = 486)        | T3 ( <i>n</i> = 511)        |                              |
| Daily dietary nutrient intake ( <i>n</i> = 1501) |                                          |                             |                             |                              |
| Energy (kcal)                                    | 1845.8 ± 654.6 <sup>ab</sup>             | 1799.0 ± 562.1 <sup>a</sup> | 1898.4 ± 546.4 <sup>b</sup> | 0.029                        |
| Carbohydrate (g)                                 | 233.8 ± 88.1 <sup>a</sup>                | 224.0 ± 81.2 <sup>a</sup>   | 227.9 ± 76.8 <sup>a</sup>   | 0.165                        |
| Carbohydrate (% of energy)                       | 51.1 ± 9.7 <sup>a</sup>                  | 50.0 ± 9.8 <sup>a</sup>     | 48.1 ± 9.8 <sup>b</sup>     | 0.000                        |
| Protein (g)                                      | 68.5 ± 28.3 <sup>a</sup>                 | 67.2 ± 25.8 <sup>a</sup>    | 74.0 ± 25.2 <sup>b</sup>    | 0.000                        |
| Protein (% of energy)                            | 14.5 ± 3.7 <sup>a</sup>                  | 15.0 ± 3.8 <sup>b</sup>     | 14.8 ± 3.6 <sup>a</sup>     | 0.002                        |
| Fat (g)                                          | 72.3 ± 34.4 <sup>a</sup>                 | 71.8 ± 30.2 <sup>a</sup>    | 78.8 ± 32.4 <sup>b</sup>    | 0.001                        |
| Fat (% of energy)                                | 34.4 ± 9.0 <sup>a</sup>                  | 34.9 ± 9.0 <sup>a</sup>     | 37.0 ± 8.9 <sup>b</sup>     | 0.000                        |
| Iron (mg)                                        | 10.3 ± 6.6 <sup>a</sup>                  | 10.1 ± 5.2 <sup>a</sup>     | 11.4 ± 8.7 <sup>b</sup>     | 0.010                        |
| Folate (μg)                                      | 199.3 ± 92.4 <sup>a</sup>                | 208.9 ± 112.8 <sup>ab</sup> | 216.0 ± 92.6 <sup>b</sup>   | 0.030                        |
| Vitamin B <sub>12</sub> (μg)                     | 5.0 ± 9.5 <sup>a</sup>                   | 5.2 ± 7.7 <sup>a</sup>      | 5.9 ± 8.3 <sup>a</sup>      | 0.235                        |
| Vitamin D (μg)                                   | 7.7 ± 13.6 <sup>a</sup>                  | 8.5 ± 13.7 <sup>ab</sup>    | 9.8 ± 14.5 <sup>b</sup>     | 0.049                        |
| Supplement intake (frequency/month)              |                                          |                             |                             |                              |
| Milk powder, 265 (17.6%)                         | -                                        | -                           | -                           | -                            |
| Multivitamin/multimineral, 926 (61.7%)           | 2.5 ± 0.5 <sup>a</sup>                   | 2.7 ± 0.4 <sup>b</sup>      | 2.8 ± 0.4 <sup>c</sup>      | 0.000                        |
| Iron, 168 (11.2%)                                | -                                        | -                           | -                           | -                            |
| Folate, 683 (45.5%)                              | 2.6 ± 0.5 <sup>a</sup>                   | 2.6 ± 0.5 <sup>a</sup>      | 2.7 ± 0.4 <sup>b</sup>      | 0.007                        |
| Vitamin B complex, 270 (18.0%)                   | -                                        | -                           | -                           | -                            |
| Vitamin D, 167 (11.1%)                           | -                                        | -                           | -                           | -                            |
| Calcium, 660 (43.9%)                             | 2.4 ± 0.5 <sup>a</sup>                   | 2.5 ± 0.5 <sup>b</sup>      | 2.6 ± 0.5 <sup>b</sup>      | 0.000                        |

<sup>1</sup> Continuous data are presented as the mean ± standard deviation, whereas categorical data are presented as the number and percentage in the parentheses. Different superscript letters for continuous variables indicate significantly different ( $p \leq 0.05$ ) using Turkey's post hoc test. The dash line indicates no data provided because less proportion (<20%) of the women took this supplement.

<sup>2</sup> Tertiles of serum vitamin D levels: T1: 20 to >53 nmol/L, T2: 54 to >71 nmol/L, and T3: 72 to 154 nmol/L.

<sup>3</sup> The *p*-value was determined using one-way analysis of variance test for continuous variables and chi-square test for categorical variables.

**Table S3.** The association of processed food dietary pattern with anemia related biochemical variables in serum evaluated by the generalized linear regression analysis<sup>1</sup>.

| Variables                        | Model 1              | Model 2              | Model 3             |
|----------------------------------|----------------------|----------------------|---------------------|
|                                  | $\beta$ (95% CI)     | $\beta$ (95% CI)     | $\beta$ (95% CI)    |
| Hemoglobin (mmol/L)              | -0.00 (-0.43, 0.40)  | -0.00 (-0.45, 0.40)  | 0.00 (-0.40, 0.43)  |
| Iron ( $\mu$ mol/L)              | 0.03 (-0.03, 0.11)   | 0.02 (-0.04, 0.10)   | 0.03 (-0.03, 0.11)  |
| Ferritin (nmol/L)                | -0.01 (-0.56, 0.54)  | -0.00 (-0.56, 0.50)  | 0.00 (-0.46, 0.62)  |
| TIBC ( $\mu$ mol/L)              | -0.03 (-0.14, 0.07)  | -0.02 (-0.11, 0.05)  | -0.03 (-0.13, 0.02) |
| Transferrin saturation (%)       | -0.04 (-0.10, 0.01)  | -0.04 (-0.10, 0.01)  | -0.05 (-0.11, 0.00) |
| Folate (nmol/L)                  | 0.03 (-0.04, 0.14)   | 0.02 (-0.05, 0.11)   | 0.02 (-0.05, 0.12)  |
| Vitamin B <sub>12</sub> (pmol/L) | -0.04 (-1.44, 0.09)* | -0.05 (-1.48, 0.02)* | -0.04 (-1.34, 0.18) |
| Vitamin D (nmol/L)               | 0.03 (-0.04, 0.20)   | 0.02 (-0.07, 0.16)   | 0.02 (-0.06, 0.18)  |

<sup>1</sup>The values of  $\beta$  and data in the parentheses indicate regression coefficient and 95% confidence interval (95% CI), respectively, after covariate adjustment in different models: model 1, crude model; model 2, adjusted for age, region of residence, parity, and trimester; and model 3, adjusted for age, region of residence, parity, trimester, and daily dietary intake, such as energy (kcal), carbohydrate (% of energy), protein (g and % of energy), fat (g and % of energy), iron (mg), folate ( $\mu$ g), and vitamin D ( $\mu$ g). \* $p \leq 0.05$ .

TIBC, total iron-binding capacity.

**Table S4.** Odds ratios (ORs) of low anemia related biochemical variables in serum across the tertiles of processed food dietary pattern assessed by binomial logistic regression analysis<sup>1</sup>.

| Variables <sup>2</sup>           | Processed Food Dietary Pattern <sup>3</sup> |                   |                              |                   |                              |                   |
|----------------------------------|---------------------------------------------|-------------------|------------------------------|-------------------|------------------------------|-------------------|
|                                  | Model 1                                     |                   | Model 2                      |                   | Model 3                      |                   |
|                                  | OR (95% Confidence Interval)                |                   | OR (95% Confidence Interval) |                   | OR (95% Confidence Interval) |                   |
|                                  | T2                                          | T3                | T2                           | T3                | T2                           | T3                |
| Hemoglobin (mmol/L)              | 0.43 (0.11, 1.66)                           | 0.33 (0.09, 1.23) | 0.40 (0.15, 2.58)            | 0.94 (0.32, 2.77) | 0.32 (0.07, 1.43)            | 0.69 (0.41, 1.17) |
| Iron (μmol/L)                    | 1.04 (0.81, 1.33)                           | 1.02 (0.79, 1.31) | 1.00 (0.75, 1.29)            | 1.03 (0.79, 1.34) | 1.05 (0.81, 1.37)            | 1.02 (0.78, 1.34) |
| Ferritin (nmol/L)                | 0.95 (0.74, 1.22)                           | 0.98 (0.77, 1.26) | 0.89 (0.67, 1.19)            | 0.88 (0.66, 1.18) | 0.87 (0.65, 1.16)            | 0.82 (0.61, 1.11) |
| TIBC (μmol/L)                    | 1.00 (0.14, 1.12)                           | 0.90 (0.13, 1.11) | 1.01 (0.15, 1.13)            | 1.00 (0.13, 1.13) | 1.12 (0.16, 1.15)            | 1.02 (0.14, 1.12) |
| Transferrin saturation (%)       | 0.96 (0.75, 1.23)                           | 1.07 (0.84, 1.38) | 0.95 (0.74, 1.22)            | 1.07 (0.84, 1.38) | 0.94 (0.73, 1.21)            | 1.09 (0.84, 1.41) |
| Folate (nmol/L)                  | 0.73 (0.52, 1.01)                           | 0.76 (0.54, 1.05) | 0.78 (0.54, 1.13)            | 0.93 (0.64, 1.35) | 0.76 (0.52, 1.11)            | 0.89 (0.61, 1.31) |
| Vitamin B <sub>12</sub> (pmol/L) | 0.89 (0.66, 1.20)                           | 1.15 (0.86, 1.53) | 0.91 (0.67, 1.24)            | 1.23 (0.91, 1.66) | 0.89 (0.65, 1.22)            | 1.21 (0.89, 1.65) |
| Vitamin D (nmol/L)               | 0.71 (0.53, 0.95)*                          | 0.97 (0.73, 1.28) | 0.68 (0.51, 0.92)*           | 1.02 (0.76, 1.36) | 0.75 (0.55, 1.02)            | 1.01 (0.75, 1.36) |

<sup>1</sup> Three different models were performed in binomial logistic regression analysis: model 1, crude model; model 2, adjusted for age, region of residence, parity, and trimester; and model 3, adjusted for age, region of residence, parity, trimester, and daily dietary intake, such as energy (kcal), carbohydrate (% of energy), protein (g and % of energy), fat (g and % of energy), iron (mg), folate (μg), and vitamin D (μg).

<sup>2</sup> Variables were divided into two levels on the basis of cutoff values in serum: hemoglobin, 6.52 mmol/L (10.5 g/dL); iron, 10.7 μmol/L (60 μg/dL), ferritin, 0.034 nmol/L (15 ng/mL); TIBC, 42.96 μmol/L (240 μg/dL); transferrin saturation, 16%; folate, 13.6 nmol/L (6 ng/mL); vitamin B<sub>12</sub>, 149.8 pmol/L (203 pg/mL); and vitamin D, 75 nmol/L (30 ng/mL).

<sup>3</sup> Dietary pattern scores were divided into tertiles: T1 (reference), 0.56-38.85; T2, >38.87-65.61; and T3 >65.85-436.82.

\* $p \leq 0.05$ .

TIBC, total iron-binding capacity.
